# Supplementary material for: CRISPR/Cas9-mediated PINK1 deletion leads to neurodegeneration in rhesus monkeys
Source: PubMed Central journal article supplement (PMC6461954; doi:10.1038/s41422-019-0142-y), 2019-02-15
Supplement: 41422_2019_142_MOESM3_ESM.pdf [file 41422_2019_142_MOESM3_ESM.pdf]

**Supplementary information, Movie S1**

Representative videos of M6 (left) and an age-matched wild-type monkey (right). The videos were recorded at the age of 1.5 years.
